# Supplementary material for: Synthesis of Crocin I and Crocin II by Multigene Stacking in Nicotiana benthamiana
Source: MDPI journal article supplement (doi:10.3390/ijms241814139), 2023-09-15
Supplement: s1 [file s1]

## SUPPLEMENTARY INFORMATION

This file contains the Supplementary Figures and Supplementary Tables corresponding to the manuscript: **“Synthesis of crocin I and crocin II by multigene stacking in *Nicotiana benthamiana*”**

Lei Xie<sup>1</sup>, Zuliang Luo<sup>1</sup>, Xunli Jia<sup>1</sup>, Changming Mo<sup>2</sup>, Xiyang Huang<sup>3</sup>, Yaran Suo<sup>4</sup>, Shengrong Cui<sup>1</sup>, Yimei Zang<sup>1</sup>, Jingjing Liao<sup>2\*</sup> & Xiaojun Ma<sup>1\*</sup>

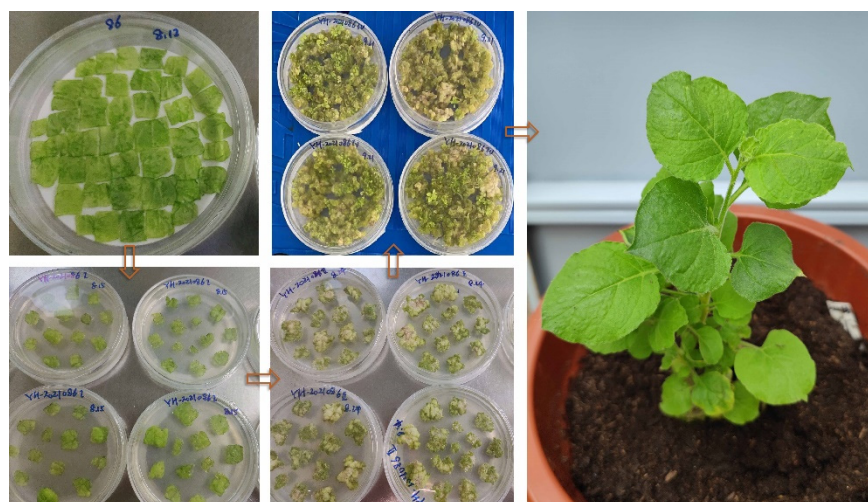

**Figure S1. Process of agrobacterium tumefaciens-mediated transformation of multi-gene vector AU-CU into *Nicotiana benthamiana*.**

TGAGACTTTTCAACAAAGGGTAATATCCGGAAACCTCCTCGGATTCCATTGCCAGCTATCTGTC  
 ACTTTATTGTGAAGATAGTGGAAGGAAGGTGGCTCCTACAAATGCCATCATTGCGATAAAGG  
 AAAGGCCATCGTTGAAGATGCCTCTGCCGACAGTGGTCCCAAAGATGGACCCCCACCCACGAG  
 GAGCATCGTGGAAGAAAGAAGACGTTCCAACCACGTCTTCAAAGCAAGTGGATTGATGTGATATC  
 TCCACTGACGTAAGGGATGACGCACAATCCCACTATCCTTCGCAAGACCCCTCCTCTATATAAG  
 GAAGTTTCATTTCAATTTGGAGAGAACAATGGCCGTCCAAAGCAACGGCAATGGAAGCTCGG  
 ATTCTCATGTTAAGGTTCCCTCAGATAAAGTTACCAAGCTCTTCATCAATGGAGAGTT  
 CGTTGATTCTGTTTCAGGAAAGACGTTTGAGACAATAGATCCAAGAAATGGGGAGGT  
 GATTGCAGAAATTGCCGAGGGGGGCAAGGAAGATGTTGATTGGCTGTCAAAGCTGC  
 CCGAGAAGCTTTTGACCACGGCCCATGGCCTCGTTTACCTGGCTCTGAGAGGCGAAA  
 GATAATGATGAAGTTTGCAGACTTAATAGATGAAAATACCCAAGAATTGGCCACCTT  
 GGATGCAATTGATGCTGGAAAATTGTTTTACCTTTGCAAGATTATGGATATTCCAGGA  
 GCAGCAGAAACAATTGCTATTATGCGGGTGCGGCAGATAAGATTTCATGGGGAGACT  
 CTAATAATGTCAACCGCGCTACAAGGATACACATTGCATGAGCCCATTTGGAGTTGTT  
 GGACACATCATTCCCTGGAACCTCCCCAGTCAAATGTTTGCTATGAAGGTTGGCCCTG  
 CATTAGCAGCTGGCTGCACCATGGTAGTCAAGCCTGCTGAACAGACGCCTCTGTCAG  
 CCCTCTATTACGCTCATTTAGCAAAGCTGGCTGGAATCCCCGATGGAGTGCTAAACGT

TGTAACAGGATTCGGACAAACAGCTGGTGCGGCAATTAGCTCTCATATGGACATTGA  
TATGGTAAGTTTCACGGGTTCTACAGAAGTAGGGCGTCTCGTCATGCAAGCTGCAGC  
AAACAGCAACTTAAAGCCTGTGTGTCTAGAACTGGGAGGCAAGTCCCCATTTTAAT  
CTTCGATGATGCAGATGTTGACAAAGTTACAGAACTCGCACTGCAGGGAAGTCTATTT  
AAACAGGGTGAAATATGTGTTGCTGGCTCTCGTATTTTTGTTCAAGAGGGGATTTATG  
ACAAGTTTTTAATCAAGTTGAAGCAGAAGGTGAAGAATTGGGTGGTCGGTGACCCCTT  
TTGATCCAACATCTCATCAAGGACCCCAAGTTGACAAGAAGCAGTACGATAGAATAC  
TTTCATACATCGAGCATGGGAAGAAGGAAGGTGCCACCTTATTCCACGGTGGCAAGC  
CTTGTGACGGGAAGGGCTACTACATTGAGCCAACAATATTCACTGATGTCACGGATG  
AGATGACTATTGCGAAGGAAGAAATATTTGGGCCTGTGATGTCAGTATTCAAATTCA  
AGACTGTTGAGGAGGCAATCAAGAGAGCAAATGCGACCAAATATGGACTGGCAGCG  
GGCGTCATGACTAACAACATTAACATCGCCAACACCGTCGCAAGATCAATCCGTGCG  
GGTGCTATCTGGATAAATTGTTACTTTGCCTTCGACAGAGATAGCCCTTACGGAGGCT  
ACAAAATGAGTGGTTTTCGGGAGAGACATGGGAATGGATGGCCTCAAGAAGTATCTTG  
CAGTTAAAGCTGTTGCTACCCCCATTTATAATTCACCTTGGCTG**GAGCAGAACTCAT**  
**CTCTGAAGAGGATCTGGGAAGCGGAGCTACTAACTTCAGCCTGCTGAAGCAGGCTGG**  
**AGACGTGGAGGAGAACCCTGGACCT**ATGAAGGTACTAATGTTGCCATGGTTAGCTCA  
TGGTCACATCTCTCCTTTCTTAGAGCTAGCCAAGAGGCTGGCAAAGAAAACTTCCAC  
ATCTACCTGTGTTCCACCTCTGTCAATCTCAGCTCCATCAAGAACAAGATTACCGGAG  
AATATTCCGACTCAATAGAACCAGTTGAGCTACAGCTTCCATGCTTGCCTGATCTTCC  
TCCTCATTACCACACCACCAATGGCCTCCCACCCCATCTCATGACCACCTCAAAACA  
GCCTATGAACTGTCAGCTCCCGACTTTTCTAATATCCTCACCGCTCTGCATCCTGACTT  
GGTTGTGTACGACTTTAACCAGCCGTGGGCAGCAGAAATTGCTTCGTCTAAAAACATC  
CCAGCAGTTCAATTTCTCCCGTTGGGGCAACAATGATGGCTTTCAGTCTGCACATGC  
TCAAGTATTCTGGAAAAGAATCCCCCACCCAGAAATTTATATCCGGGACTACGAGA  
TGCTCAAGTTTCAGTCAAGGAACGATCAAGTTAATGATGTTAGTGATAGAGAAAGAA  
TCCTGCAAGCTCTGGACCTGTCTGTGAAGATTTTGTGGTCAAGTCGTTCAAAGAAAT  
CGAAGAAAAATTCATGAATACTCTCTCTGTTGCATCTGGTAAAAAGGTGGTCCCCGTT  
GGCCCTCTTGTCCAAGACGTCAATATCGATGACATTCAAGATGAGGAAATGGAATC  
ATCCATTGGCTTGACCAAAAGGAAAATGCTTCAGTGGTGTGTTGTCTCTTTTGGTAGTG  
AGTATTTCTTGACTAAGGAGGAAAGAAACGAGATTGCTCGGGGTCTTGAGCTCAGCA  
ATGTTAACTTTATATGGGTAATTAGGTTCCCTCTGGGAGGAAAAATAACTATGGAAGA  
AGCATTGCCCCAAGGTTTTCTTGAGAGAGTGGGAGATAGAGGAAAAATGTGGATGG  
ATGGGCTCCTCAGGCAAGAATTTTGAAGCATGCGAATACTGGTGCTTTTTTGAGCCAT  
TGTGGATGGAGTTCAATGATGGAGAGTATGAAATTTGGTGTTCCAATAATAGCTATGC  
CTATGAGTGTTGATCAACCTGTGAATGCTAGATTGATTGAAGCAGTTGGAGTGGGATT  
GGAGCCCTTGAGAGACGAGAAGGGGAATCTTCAAAGTGCGGAGATTGCCAAAGTGA  
TTAGAAAGGTTTTTGGTGGACGAAAGTGGAGAAAAATGTGAGGAGGAAGGCTAAGGAA  
TTGAGTGAACAAATGGAATGAGAGGTGACGAGGAGGAGATTGATAACCTTGTAGA  
GGAGCTGCTGCAACTCTGCCGAAAGAACAACGGGGGCTGTGATTACAAGGATGACGA  
CGATAAGTAA**ATATGAAGATGAAGATGAAATATTTGGTGTGTCAAATAAAAAGTTGTGTGCT**  
**TAAGTTGTGTTTTTTCTTGGCTTGTGTGTTATGAATTTGTGGCTTTTTCTAATATTAAATGAATG**  
**TAACATCTCATTATAATGAATAAACAAATGTTTCTATAATCCATTGTGAATGTTTGTGGATCTCT**  
**TCTCCAGCATATACTACTGTATGTGCTATGGTATGGACTATGGAATATGATTAAAGATAAG**

GTCGACGAGTCAGTAATAAACGGCGTCAAAGTGCGTTGCAGCCGGCACACACGAGTCGTGT  
TTATCAACTCAAAGCACAAATACTTTTCCTCAACCTAAAAATAAGGCAATTAGCCAAAAA  
CAACTTTGCGTGTAACAACGCTCAATACACGTGTCATTTATTATTAGCTATTGCTTCACC  
GCCTTAGCTTTCTCGTGACCTAGTCGTCTCTTTCTTCTTCTTCTTCTATAAAAACAATA  
CCCAAAGAGCTCTTCTTCTCACAATTCAGATTTCATTTCTCAAAATCTTAAAAACTTTCT  
CTCAATTCTCTTACCGTGATCAAGGTAAATTTCTGTGTTCCCTTATTCTCTCAAAATCTTCG  
ATTTGTGTTTTGTTTCGATCCCAATTCGTATATGTTCTTTGGTTTAGATTCTGTAAATCTTAG  
ATCGAAGACGATTTTCTGGGTTTGATCGTTAGATATCATCTTAATTCGATTAGGGTTTCA  
TAGATATCATCCGATTTGTTCAAATAATTTGAGTTTGTGCGAATAATTACTCTTCGATTTGT  
GATTTCTATCTAGATCTGGTGTTAGTTTCTAGTTTGTGCGATCGAATTGTCGATTAATCTG  
AGTTTTTCTGATTAACAGATGGATGCTTTCTCTTCCTCTTTCTCTCTCGACTATCCCAA  
ATCCCAAACCTTCCGACTTCTCTAACCAACCCTTCATCACCAAATATTCCTTTACTACACA  
TTTCATCCGCTAGAATTGAAGATAAGCCACAACCAACAATTATTACTAGCACCCCCATC  
ACTGCCACAACGCCACCATCATCTAATTCTAATCCCCTTAAGAAGCAGAACCTACCGAA  
ATATACACTTAAAAGATCCAATCCCAAGCCGCAATCATCATCACACCACCACCATCAC  
TGCAGCTGCAAGAACCTTCAAGAAAGCCAGTAGAACCATCATTGCTCACCAAATCTT  
CAATGCACTTGATAACTTCATAGACACATGCATTGATCCTCCAACCTCACCTTCTGTTGA  
CCCCAAATACGTCTGGCAAACAACCTTTGTACCAGTTGATGAACTCCCCCGACCGAA  
TGTGAGGTGGTGGAAGGCTTTCTTCCACCGTGCCTTGACGGTGCCTACTTCCGCAATG  
GCCCAAACCCTCAGTTCGTCACTCACGGGCCCTACCACTTTTTCGATGGCGATGGAATG  
ATACATTCCATCAAATCTCCGAAGGAAAAGCCACCTTCTGCAGCCGGTACGTGAAAA  
CATAAAGTACATGACGGAACGGGATACGGGCTCTCCCGTGTTCCCTAAAGTATTCTCT  
GGTTTCAATGGCCTAACAGCCTCCGCAGCCAGGGTTGCCCTAGCTGCTGCCAGAATGT  
TAGCTGGCCAATTTAACCAGCCAATGGTTTGGCCTGGCAAACACTAGCTTGGCTCTA  
GTTGGGGGGGAACTATTTCGCTTTAGGTGAACCAGACCTTCCATATGCTGTAAAATTAAC  
ACAACTGGAGATTTAGTAACCGTAGGCCGTATGACTTTGATGGTAAGCTTATTGCGA  
GCATGACTGCACATCCCAAATCGACCCTGAGACAGGTGAAGCTTTCGCATTACAGATA  
CGCGCTAATGCCTCCATTTCTAACCTTCTTTAGAATCAACCCTGATGGTACAAAAGAAC  
CAGACGTCCCGATTTTCTCCATGACACGGCCTTCATTTGTTTCATGATTTGGCCATCACA  
AGAAAATACGCTATTTTCTGACATACAAATAGGGATCAACCCTCTTCAGATGATCGC  
CGGCGGACCACTAGTGGGTTTCAGATCCCCGAAAAGTGCCACGACTCGGGGTTATTCCC  
AGGTATGCTGCGGATGAAGCTGAGATGAAGTGTTTGTGTTCCGGGACTTAATCTTAT  
GCATGCTGTCAATGCTTGGGATGAAGATGATGGTGATGGTATTGTTGTTGTAGGAAC  
ATAGTTTGGCCATTGAGCATGTTCTTTCGGCGGATGGATTTGGTTCATGCATCCATGGTGA  
AAATCAAGATTGATCTCAAGACTGGGATGGTTTGGAAACATCCAATTTCTACGAGGAG  
TATGGAATTTGGAGTCATTAATCCGGCTTATGTTGGCAAGAAGAACAAGTATGTATATGC  
AGCAGTTGTAGACCCTTTGCCAAAGGTGTCAGGAGTGGTGAAGCTAGACTTATCAGCT  
TCGGCAGGTGAGCACCGCGACTGCGTCATTGCTAGCCAGCTGTATGAACCGGAGTGCT  
TTGGAAGCGAACCATTTTTCGTGGCCAAAGACCCTAACAAACCCAAATGCAGATGAAGA  
TGATGGTTATGTGGTGTCCTATGTCCATGATGAAAACACAGGAGAGTCAAGATTCTTAG  
TGATGGACGCGAAGTCACCGAGTCTTGAAATTGTGGCTGCTGTAAAATTGCCTCAAAG  
GGTTCCTTCTGGCTTTCATGGCCTCTTTGTGAGAGAAAGTGAGCTCAATAAATTGTACC  
CATACGATGTTCCAGATTACGCTGGTTCAAGTGCCACTAATTTTTCTCTCTTGAAACAG  
GCCGGTGACGTTGAAGAGAACCCAGGTCCAATGAATTCCAGCAAAGTTCATGTTTTAG

TTCTGCCATATCCTGCCCAGGGCCACATAAACCCCTTGCTCCAGTTCTGTAAACGTTTG  
 GTGGCAAAAGGTGTCAAAACCACGTTTGTCAACACTGTCTTCGTCTCCAAGTCCATTC  
 AACCAGATCCCAGCTGCTCAATTAACCTTTGAGACCATTTCAGATGGCCATGACGAAGG  
 TGGCTATGCAGCAGCTGAAAGCCCAGAGGCCTATCTTGTAGAACTGGCCACCTTCGGC  
 TCAAAGACGTTGGCTGATCTTATCAGGAAGCTTGAAGACAAGGGCGAACCAGTCCAG  
 GCCGTGATTTATGATTCATTCCTGACATGGGCTCTTGATGTAGCTAAGCAATTTGGACTT  
 GTTACAGCTGCTTTTTTCTACTCAGACTTGTGCTGTAAACAGCGTCTACTACCATGTTTAT  
 CATGGACTTCTACCGCTCCCTCTGTCAGACTCACCTCTTTCACTTCCTGGATTGCCGCT  
 GCTCCAACCCAAGGAACTCCGTCCTTTGTTTACCTTCCCGATTTCGTATCCTGCTTTTC  
 GTCTCATGCTCGTTAATCAGTTCTCCAACGTTGATCAAGCAGATTGGGTCATCCTCAAC  
 ATTTTCCACAAATTGGAGGAAGATGTGCTGAATTGGATAGCGAACTTTGGCGAGTGA  
 TTACAGTCGGTCCAACGGTTCATCCATGTACTTGGATAAACGCCTTGAGGACGATAAA  
 TGTTACGGAATAAATCTCTTCAAGCCAGACTCCTGCCTGTGCATGAACTGGCTAAATAA  
 TCAACCAAAGGACTCGGTAGTTTATGTATCATTCGGTAGCTGGACAGAAATTGACGTAA  
 AACAAGTGGAGGAAATAGCTTCAGCTTTGAAGGAAAGCGGATTCAAATTCTTGTGGGT  
 CGTGAGATCATTTGAGAAGGAAAAGCTTCCAAGCAACTTCGCTGAGGAGACGTCGGA  
 GAAAGGCTTGGTGGTGACATGGAGTCCACAGCTTGAGGTATTGGCACATGAATCCGTC  
 GCTTGTTCGTCACTCATTGCGGGTTCAATTCAGTGCTGGAGGCGTTGAGTTTAGGGGT  
 GCCGGTGGTGGCCGCGCCGCAGTGGACGGACCAGCCACCAACGCTAAGTTTCTGGA  
 GGATATTTGGGGAGTTGGTGTGAAGGCTGGTGC GGATGAGAAAGGAATTGTGACGAG  
 GGAAACGCTAGTTTCTGCATAAGGGAGATTATGGAGGGAGAAAAAGGAAAGCAGAT  
 TAAAGAGAATGCCATTAAATGGAAGACTTTAGCCAAAGAAGCAGTTGATGAGGGCGG  
 AAGTTCTGATAAGAACATTGACGAATTTGTTGCAGAATTGGCTGGCCAGAAGGCCAG  
 AACCATCATCACCATCACCATTAGACTAGTTCGAGCTTTCGTTTCGTATCATCGGTTTCGACAA  
 CGTTCGTCAAGTTCAATGCATCAGTTTCATTGCGCACACACCAGAATCCTACTGAGTTTGAGTAT  
 TATGGCATTGGGAAAACGTGTTTTCTGTACCATTGTGTGCTTGTAAATTTACTGTGTTTTTATTC  
 GGTTTTCGCTATCGAACTGTGAAATGGAAATGGATGGAGAAGAGTTAATGAATGATATGGTCCT  
 TTTGTTCACTCTCAAATTAATATTATTGTTTTCTCTTATTGTTGTGTGTTGAATTTGAAATTATA  
 AGAGATATGCAAACATTTTGTGTTGAGTAAAAATGTGTCAAATCGTGGCCTCTAATGACCGAAGT  
 TAATATGAGGAGTAAAACACTGTAGTTGTACCATTATGCTTATTCCTAGGCAACAAATATATTT  
 TCAGACCTAGAAAAGCTGCAAATGTACTGAATACAAGTATGTCCTCTTGTGTTTAGACATTTAT  
 GAACTTTCCTTTATGTAATTTCCAGAATCCTTGTGAGATTCTAATCATTGCTTTATAATTATAGTT  
 ATACTCATGGATTGTAGTTGAGTATGAAAATATTTTTAATGCATTTATGACTTGCCAATTGATT  
 GACAACATGCATCAA

**Figure S2. The nucleotide sequence of insertion fragment in the multigene vector AU-CU.** The crocins biosynthesis genes *GjALDH2C3* (black), *GjUGT94E13* (blue), *GjCCD4a* (green), and *GjUGT74F8* (orange) were shown in this graph. P2A peptide sequences were highlighted in red. *GjALDH2C3*-2A-*GjUGT9F13* was controlled by CaMV 35S promoter (highlighted in yellow), and the terminator was heat-shock protein 18.2 terminator (Thsp) (highlighted in light blue). *GjCCD4a*-2A-*GjUGT74F8* was controlled by the AtUBQ10 promoter (highlighted in light green) and terminator from the pea *rbcs-E9* gene (Te9) (highlighted in gray).

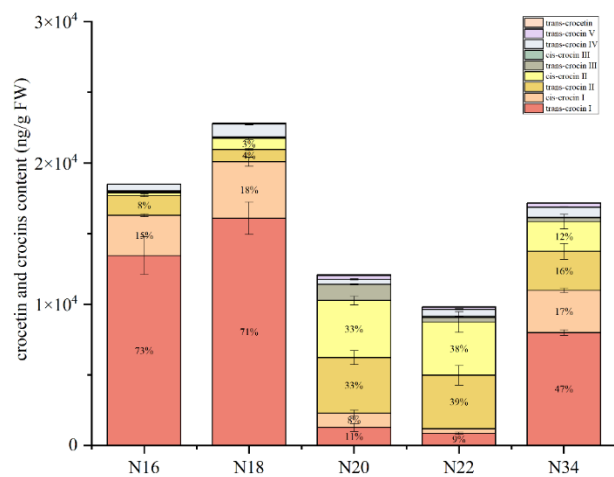

**Figure S3. Crocetin and crocins production in transgenic tobacco of T1 generation lines.** The data are presented as the mean values  $\pm$  SDs,  $n = 3$  biologically independent samples.

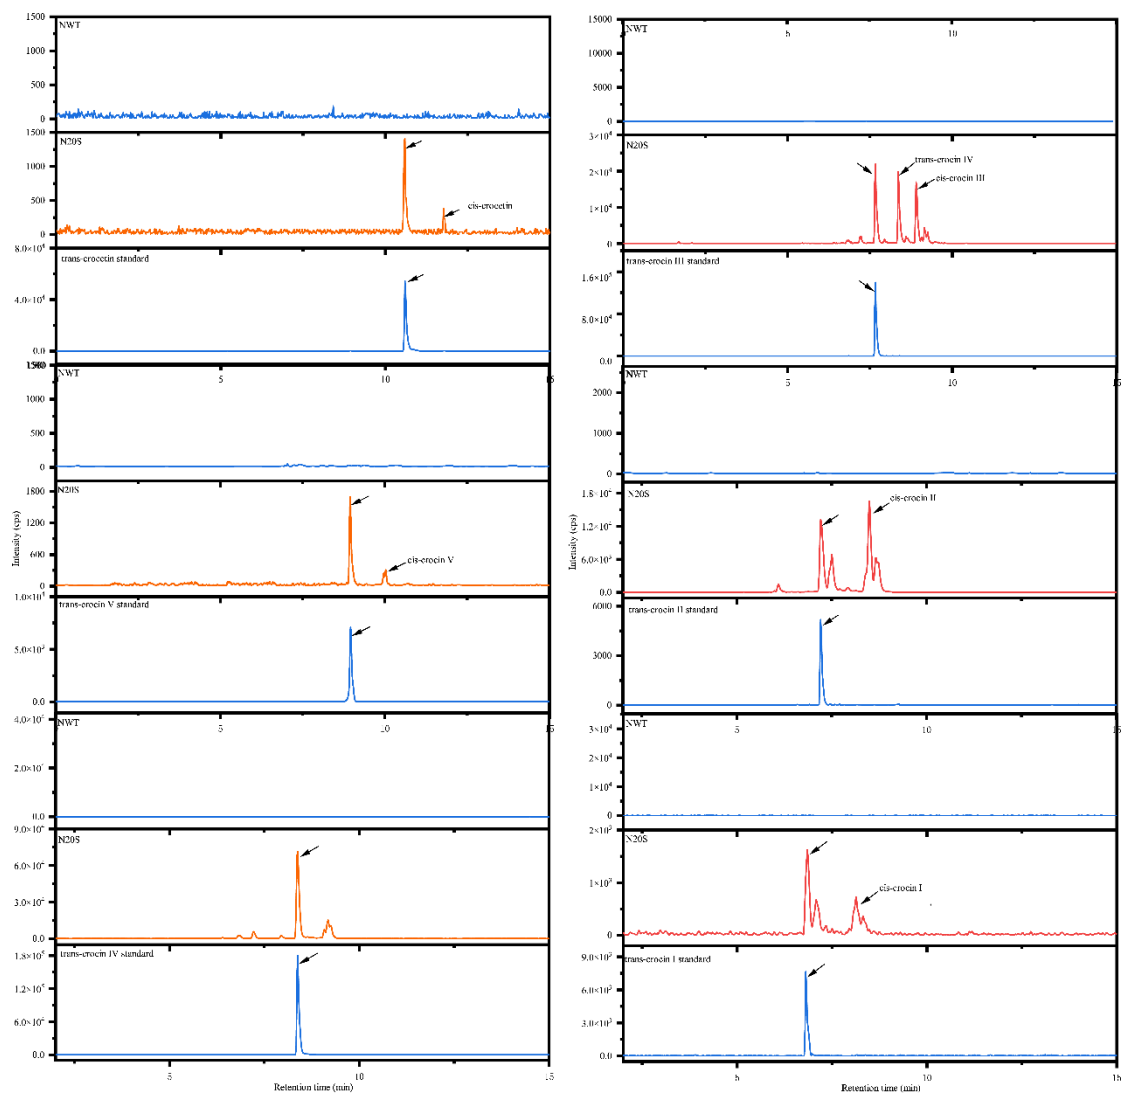

**Figure S4. Identification of crocins in the stems of the transgenic tobacco N20 line.**

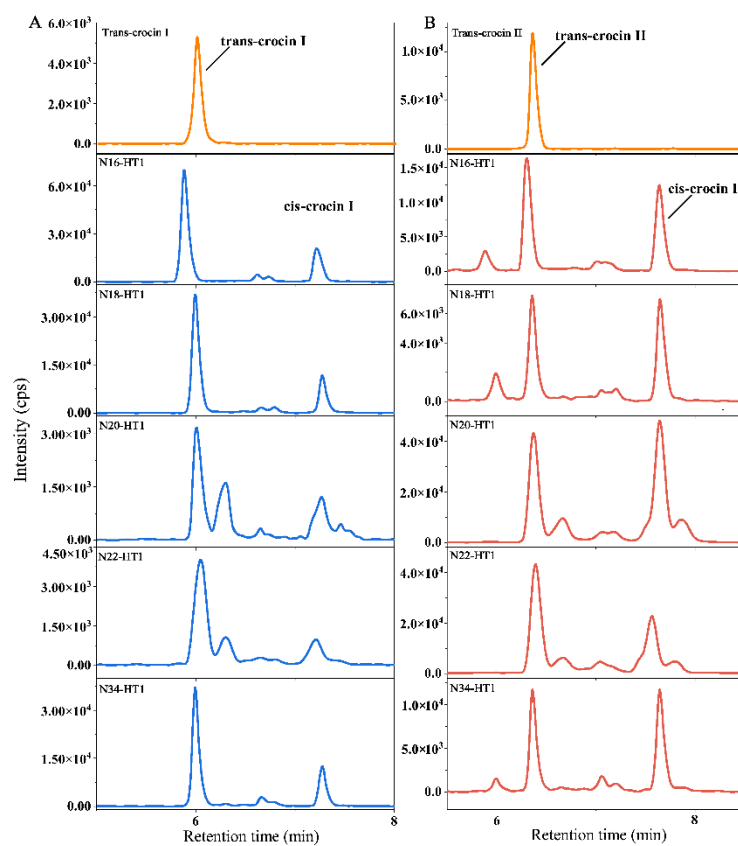

**Figure S5. Analysis of crocin I and crocin II in the transgenic tobacco line N16-HT1, N18-HT1, N20-HT1, N22-HT1 and N34-HT1.** (A) Ion pair 999.3/675.0 extraction chromatogram for analysis of crocin I in transgenic tobacco line. (B) Ion pair 837.3/675.0 extraction chromatogram for analysis of crocin II in transgenic tobacco line.

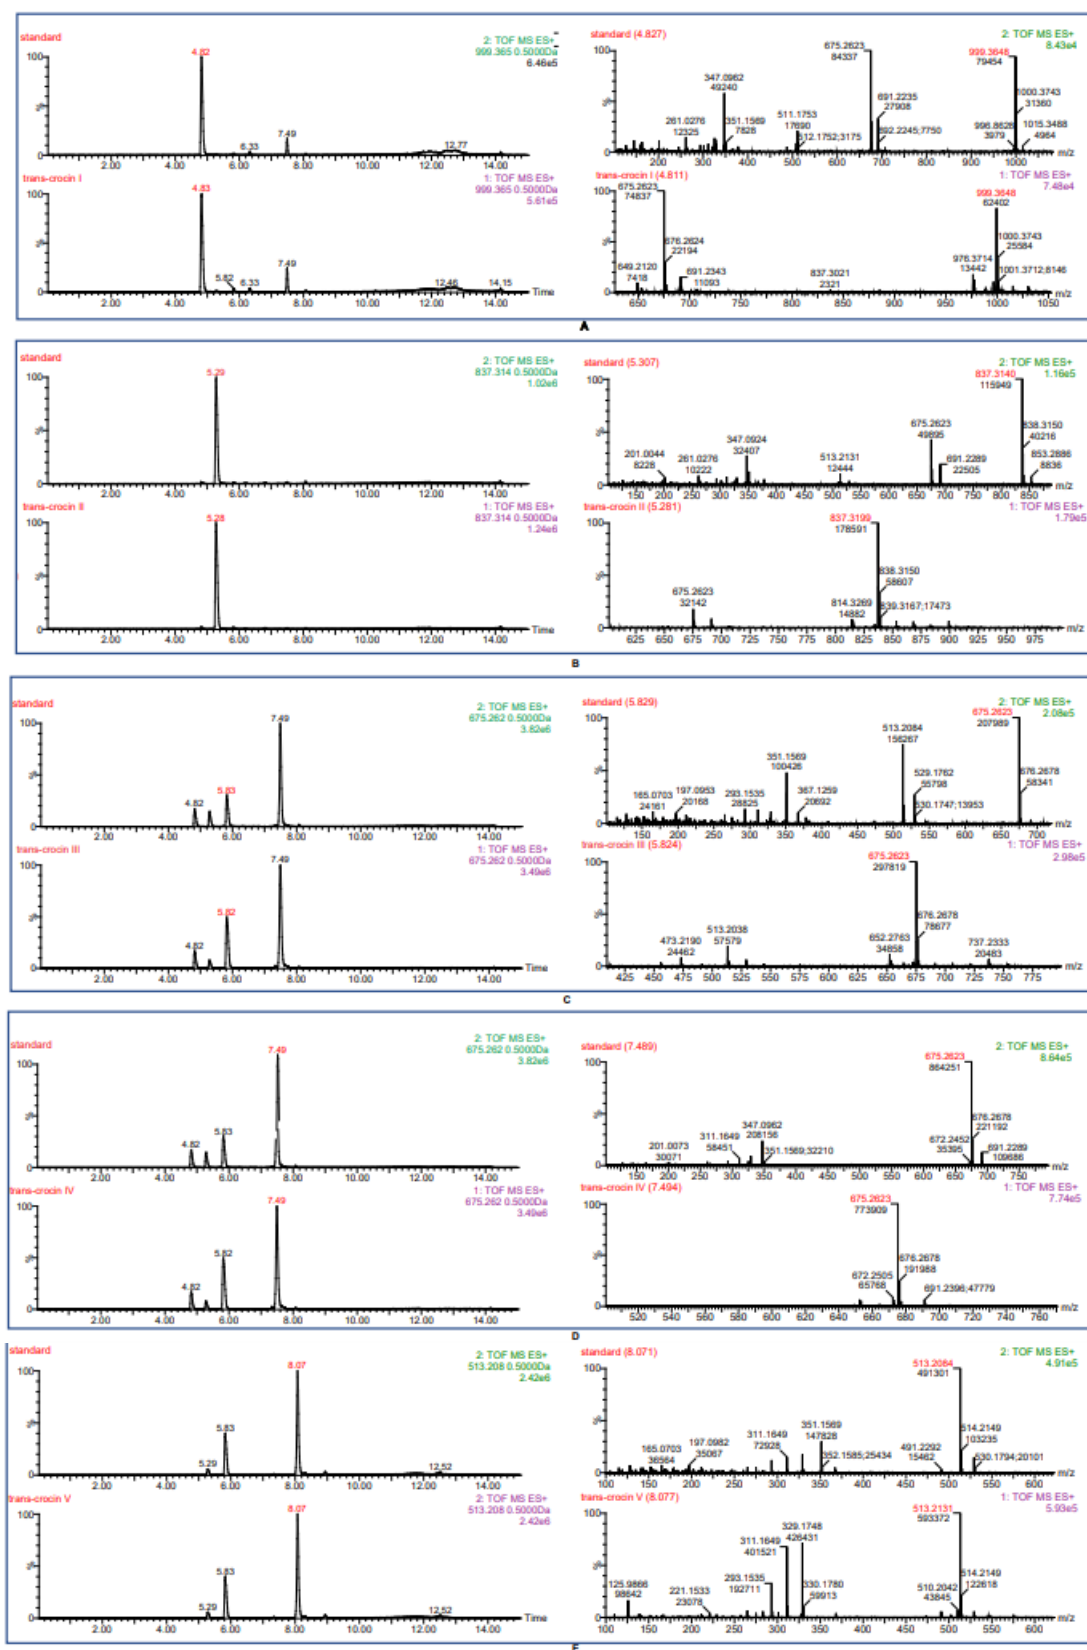

Figure S6. The UPLC-ESI-QTOF-MS/MS analysis of crocins for the standards. (A-E) The ion chromatogram, the MS and MS/MS spectra of crocin V-I.

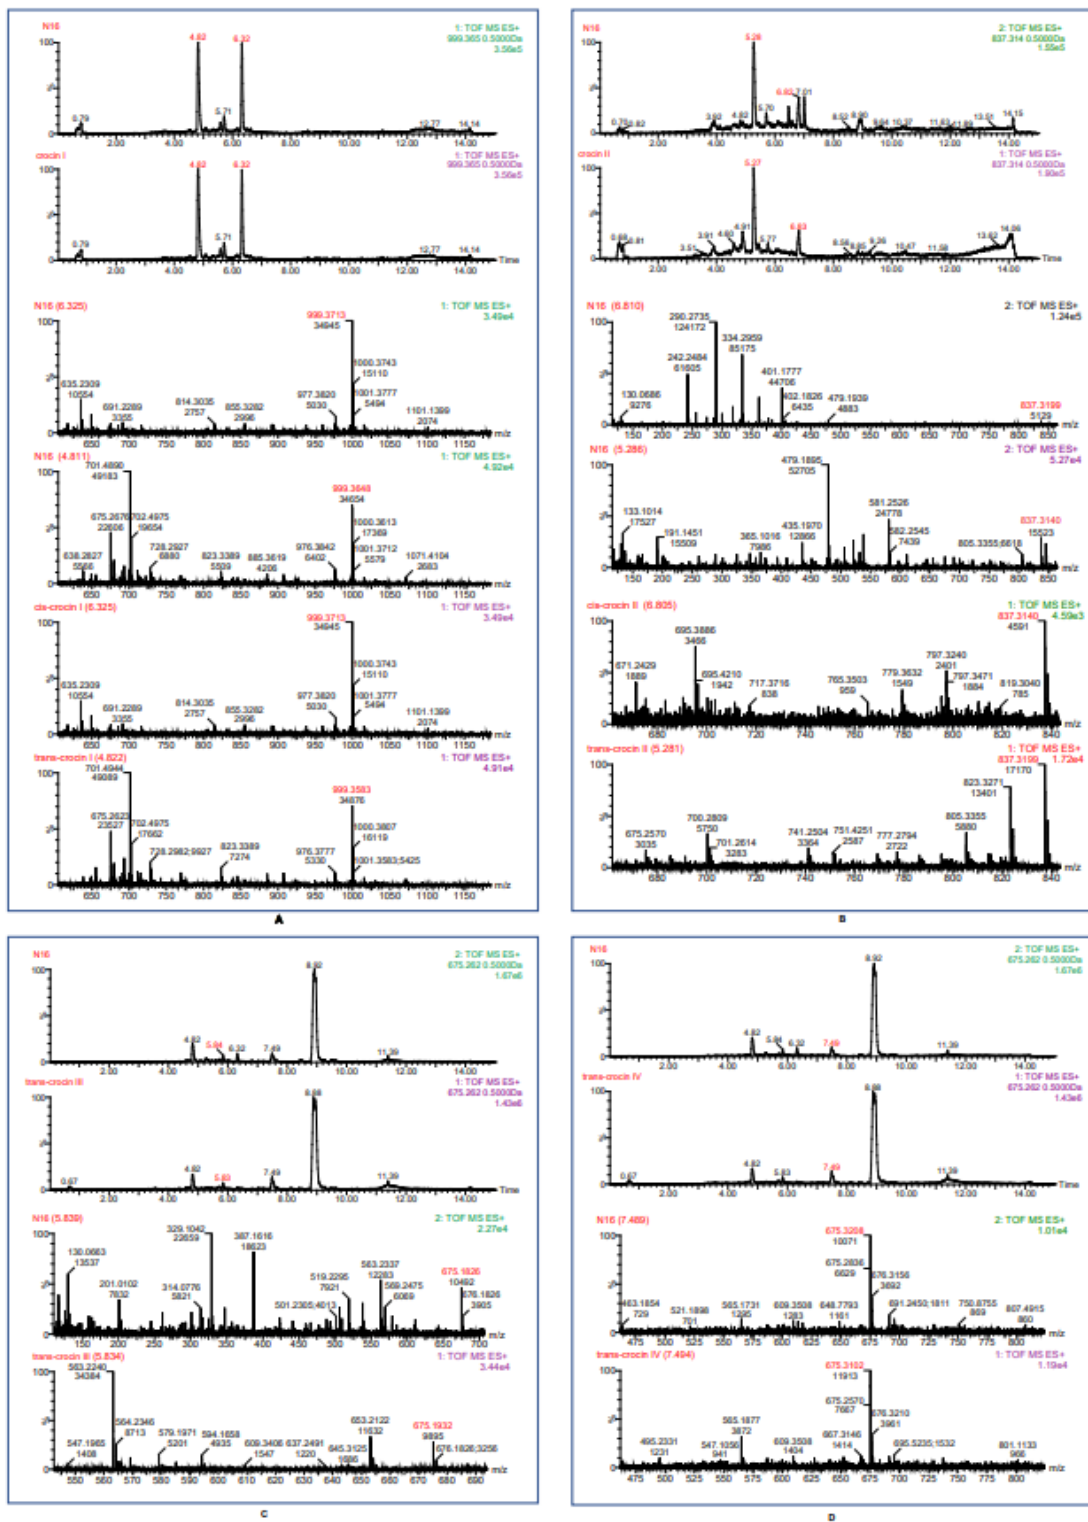

Figure S7. The UPLC-ESI-QTOF-MS/MS analysis of crocins for the N16 line. (A-D) The ion chromatogram, the MS and MS/MS spectra of crocin IV, crocin III, crocin II, and crocin I.





**Figure S8.** The UPLC-ESI-QTOF-MS/MS analysis of crocins for the N18 line. (A-D) The ion chromatogram, the MS and MS/MS spectra of crocin IV, crocin III, crocin II, and crocin I.

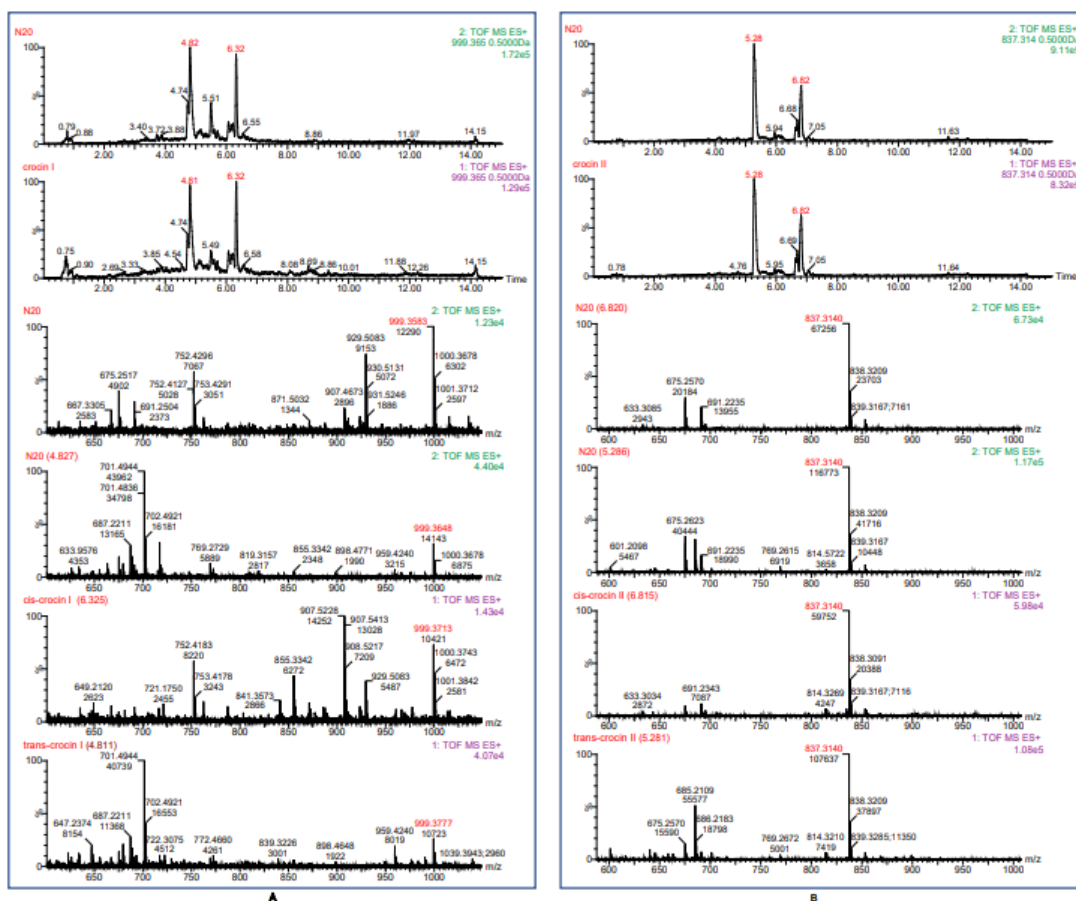

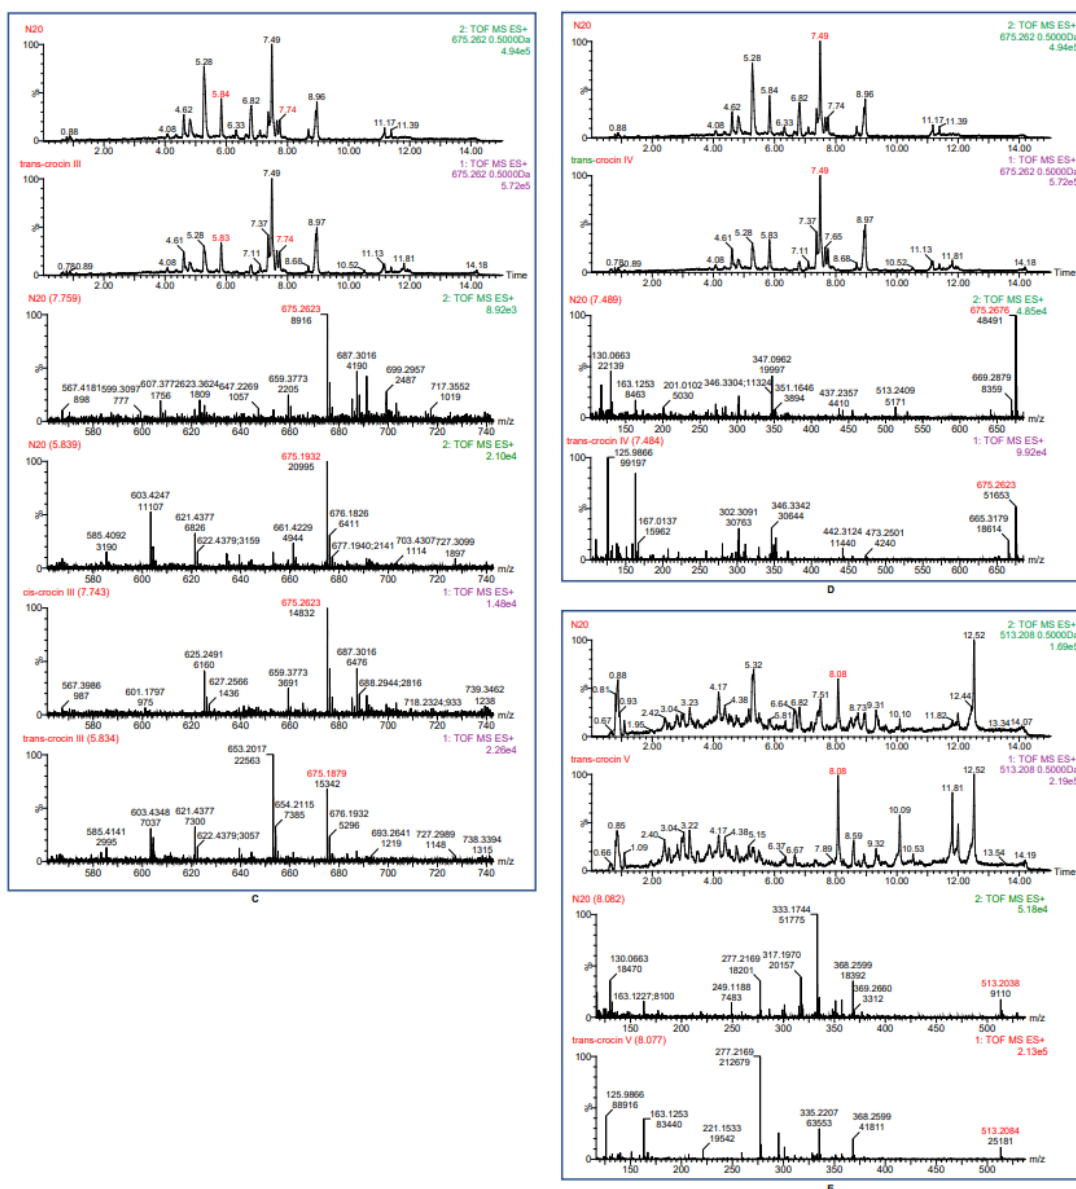

Figure S9. The UPLC-ESI-QTOF-MS/MS analysis of crocins for the N20 line. (A-E) The ion chromatogram, the MS and MS/MS spectra of crocin V, crocin IV, crocin III, crocin II, and crocin I.



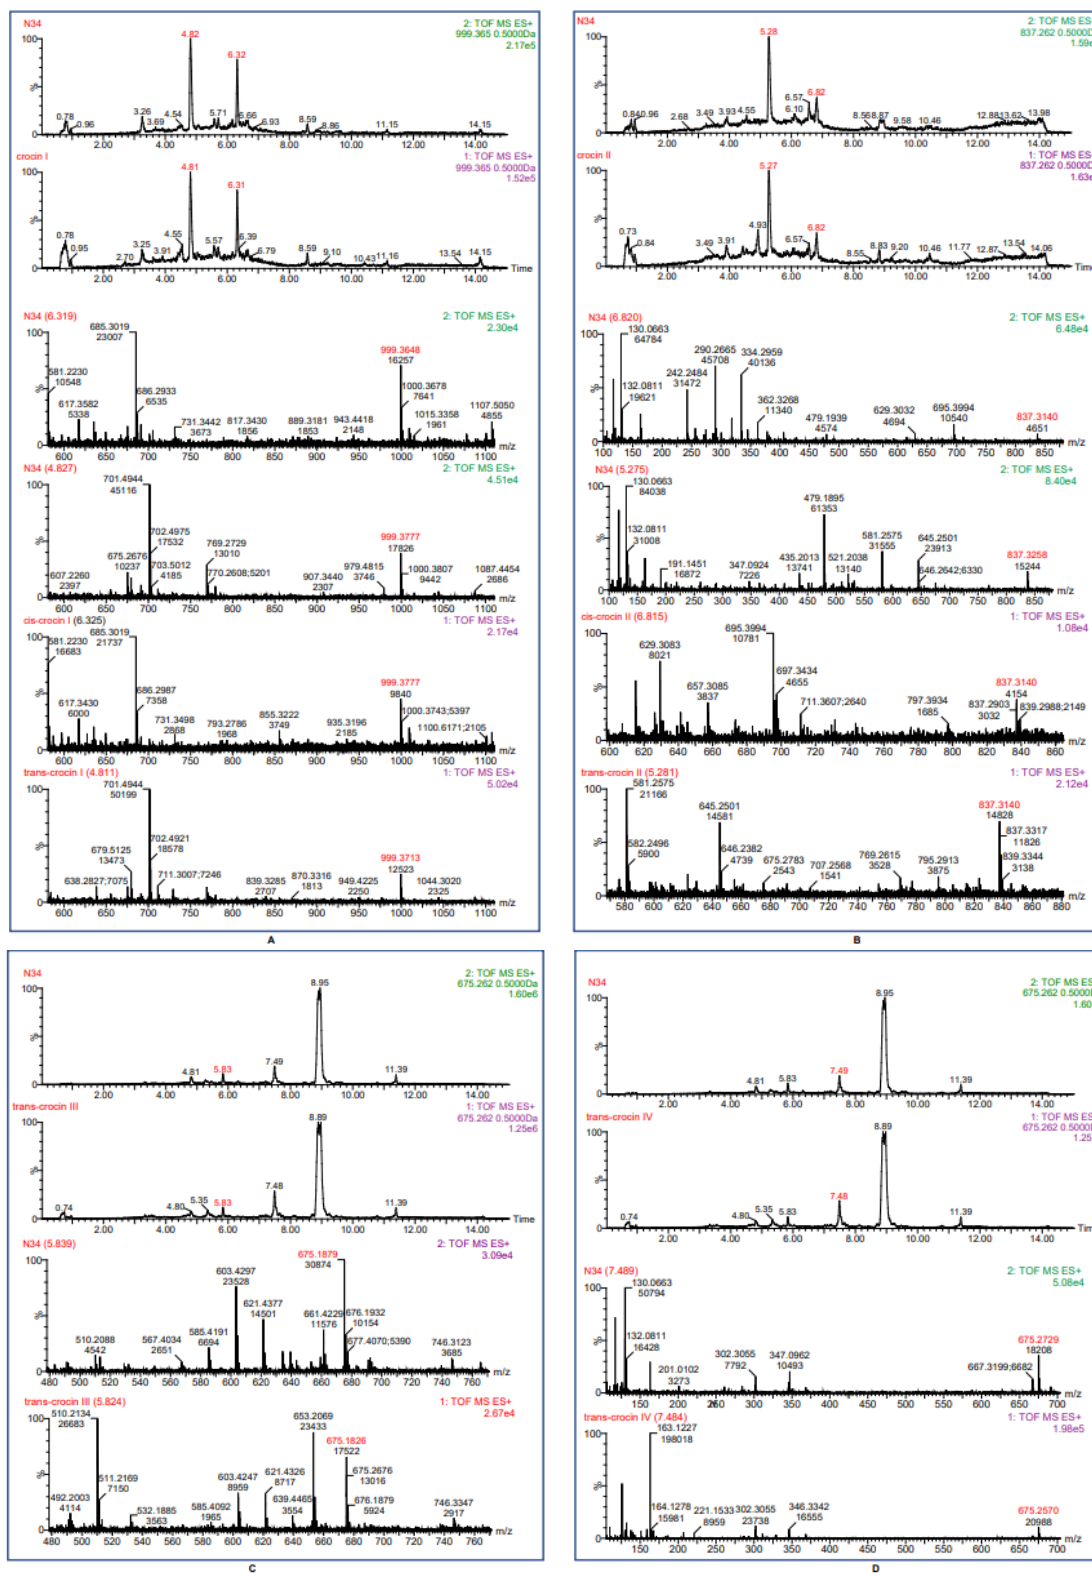

Figure S11. The UPLC-ESI-QTOF-MS/MS analysis of crocins for the N34 line. (A-D) The ion chromatogram, the MS and MS/MS spectra of crocin IV, crocin III, crocin II, and crocin I.

| Primers             | Sequences (5' to 3')         |
|---------------------|------------------------------|
| <i>GjCCD4a-F</i>    | ATGACTGATTTATTGTGTTTCCTATACG |
| <i>GjCCD4a-R</i>    | TTACAATTTATTGAGCTCACTTTCTCTG |
| <i>GjALDH2C3-F</i>  | ATGGCCGTCCAAAGCAACG          |
| <i>GjALDH2C3-R</i>  | TTACAGCCAAGGTGAATTATAAATGG   |
| <i>GjUGT74F8-F</i>  | ATGAATTCCAGCAAAGTTCATGTT     |
| <i>GjUGT74F8-R</i>  | CTAGTTCTGGGCCTTCTGGCC        |
| <i>GjUGT94E13-F</i> | ATGAAGGTACTAATGTTGCCATGG     |
| <i>GjUGT94E13-R</i> | TTAACAGCCCCCGTTGTTCTT        |

Table S1. Primers for PCR detection

| Primers              | Sequences (5' to 3')  |
|----------------------|-----------------------|
| <i>GjCCD4a-qF</i>    | CAAGATTGATCTCAAGACTGG |
| <i>GjCCD4a-qR</i>    | GTCTACAAGTCTGCATATAC  |
| <i>GjALDH2C3-qF</i>  | GGATTCTCATGTTAAGGTTCC |
| <i>GjALDH2C3-qR</i>  | GGATCTATTGTCTCAAACGTC |
| <i>GjUGT94E13-qF</i> | CAATAGAACCAGTTGAGCTAC |
| <i>GjUGT94E13-qR</i> | GATATTAGAAAAGTCGGGAGC |
| <i>GjUGT74F8-qF</i>  | CAAAGGACTCGGTAGTTTATG |
| <i>GjUGT74F8-qR</i>  | CTTCTCAAATGATCTCACGAC |
| <i>NbActin-qF</i>    | TATTCCTAGTATTGTTGGC   |
| <i>NbActin-qR</i>    | CTGGGGTATTAAAAGTCTCA  |

Table S2. Primers for qRT-PC
